# Supplementary material for: Pontiella desulfatans gen. nov., sp. nov., and Pontiella sulfatireligans sp. nov., Two Marine Anaerobes of the Pontiellaceae fam. nov. Producing Sulfated Glycosaminoglycan-like Exopolymers
Source: MDPI journal article supplement (doi:10.3390/microorganisms8060920), 2020-06-18
Supplement: s1 [file s1]

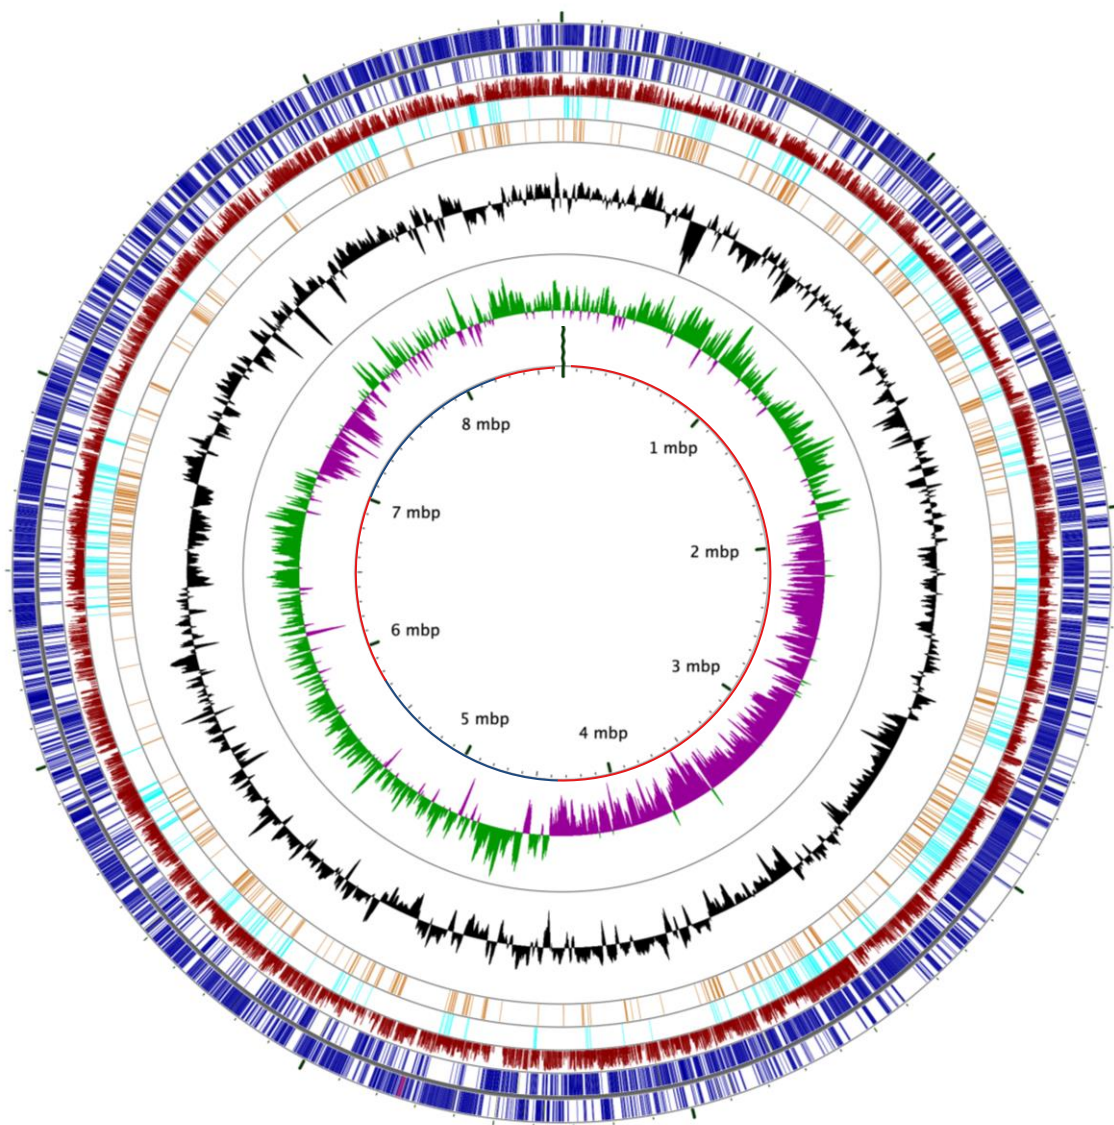

- CDS
- tRNA
- rRNA
- Other
- Pontella sulfatireligans* F21<sup>T</sup> blastx
- Sulfatase genes
- CAZyme genes
- GC content
- GC skew+
- GC skew-
