# Supplementary figures and images for: Pontiella desulfatans gen. nov., sp. nov., and Pontiella sulfatireligans sp. nov., Two Marine Anaerobes of the Pontiellaceae fam. nov. Producing Sulfated Glycosaminoglycan-like Exopolymers
Source: MDPI journal article supplement (doi:10.3390/microorganisms8060920), 2020-06-18

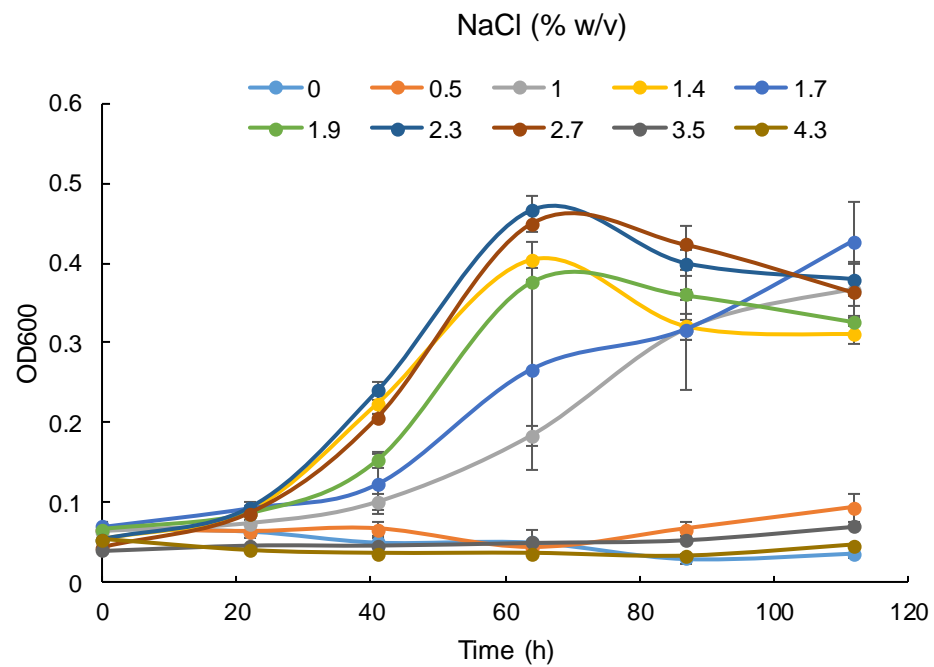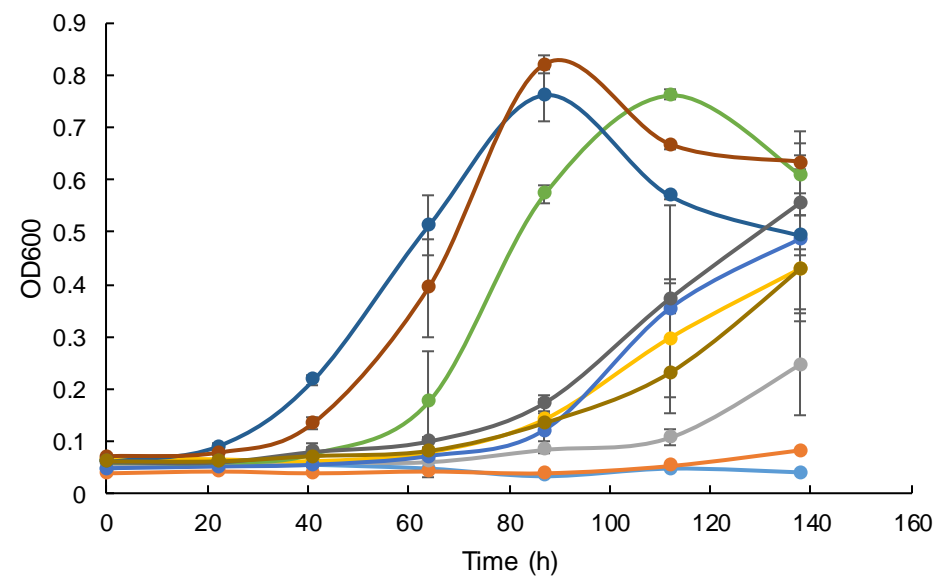

Supplement: s1 [file s1]
